# Supplementary material for: Long-Term Survival Effect of the Interval between Postoperative Chemotherapy and Radiotherapy in Patients with Completely Resected Pathological N2 Non-Small-Cell Lung Cancer
Source: MDPI journal article supplement (doi:10.3390/cancers13102494), 2021-05-20
Supplement: s1 [file s1]

### A. Local regional recurrence-free survival

#### A. Subgroup-Age

| HR (95%CI)       |       |
|------------------|-------|
| 1                | CCRT  |
| 1.25 (0.46-3.39) | SCRT1 |
| 1.11 (0.36-3.38) | SCRT2 |
| 1                | CCRT  |
| 0.37 (0.09-1.44) | SCRT1 |
| 0.86 (0.29-2.57) | SCRT2 |

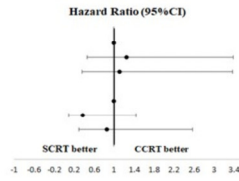

#### B. Subgroup-Sex

| HR (95%CI)       |       |
|------------------|-------|
| 1                | CCRT  |
| 0.70 (0.24-1.99) | SCRT1 |
| 0.67 (0.24-1.87) | SCRT2 |
| 1                | CCRT  |
| 1.25 (0.37-4.23) | SCRT1 |
| 1.50 (0.45-5.03) | SCRT2 |

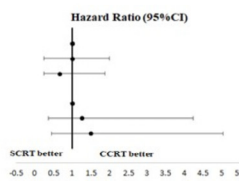

#### C. Subgroup-Tumor size

| HR (95%CI)       |       |
|------------------|-------|
| 1                | CCRT  |
| 0.79 (0.22-2.89) | SCRT1 |
| 1.06 (0.33-3.58) | SCRT2 |
| 1                | CCRT  |
| 1.10 (0.36-3.36) | SCRT1 |
| 0.81 (0.23-2.83) | SCRT2 |
| 1                | CCRT  |
| 0.29 (0.02-3.56) | SCRT1 |
| 0.58 (0.07-4.50) | SCRT2 |

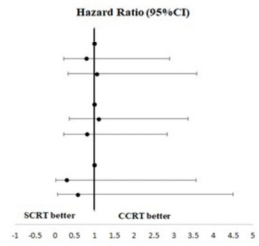

### B. Distant metastasis-free survival

#### A. Subgroup-Age

| HR (95%CI)       |       |
|------------------|-------|
| 1                | CCRT  |
| 1.22 (0.69-2.16) | SCRT1 |
| 1.45 (0.81-2.57) | SCRT2 |
| 1                | CCRT  |
| 0.65 (0.35-1.23) | SCRT1 |
| 0.46 (0.24-0.89) | SCRT2 |

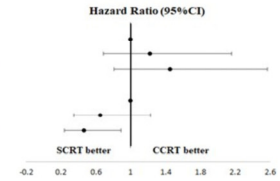

#### B. Subgroup-Sex

| HR (95%CI)       |       |
|------------------|-------|
| 1                | CCRT  |
| 0.90 (0.47-1.73) | SCRT1 |
| 1.02 (0.52-1.97) | SCRT2 |
| 1                | CCRT  |
| 0.80 (0.46-1.39) | SCRT1 |
| 0.79 (0.45-1.40) | SCRT2 |

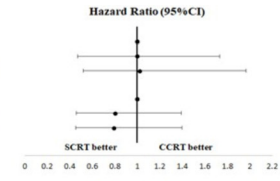

#### C. Subgroup-Tumor size

| HR (95%CI)       |       |
|------------------|-------|
| 1                | CCRT  |
| 0.84 (0.47-1.49) | SCRT1 |
| 0.56 (0.30-1.04) | SCRT2 |
| 1                | CCRT  |
| 0.98 (0.47-2.06) | SCRT1 |
| 1.18 (0.59-2.36) | SCRT2 |
| 1                | CCRT  |
| 0.73 (0.25-2.07) | SCRT1 |
| 0.72 (0.27-1.95) | SCRT2 |

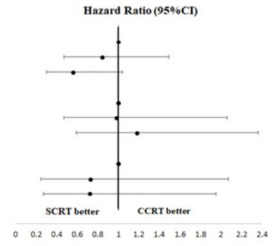

**Supplementary Figure S1:** Forest plots of aHRs showing the effect of PORT timing on (A) local regional recurrence-free survival, and (B) distant metastasis-free survival. The 95% CIs are also shown. *Abbreviations:* aHR: adjusted hazard ratio; CCRT: concurrent chemoradiation; PORT: postoperative radiotherapy; SCRT: sequential chemoradiation; CIs: confidence intervals.
